# Supplementary material for: Protein–Protein Interactions and Quantitative Phosphoproteomic Analysis Reveal Potential Mitochondrial Substrates of Protein Phosphatase 2A-B’ζ Holoenzyme
Source: MDPI journal article supplement (doi:10.3390/plants12132586), 2023-07-07
Supplement: s1 [file s1]

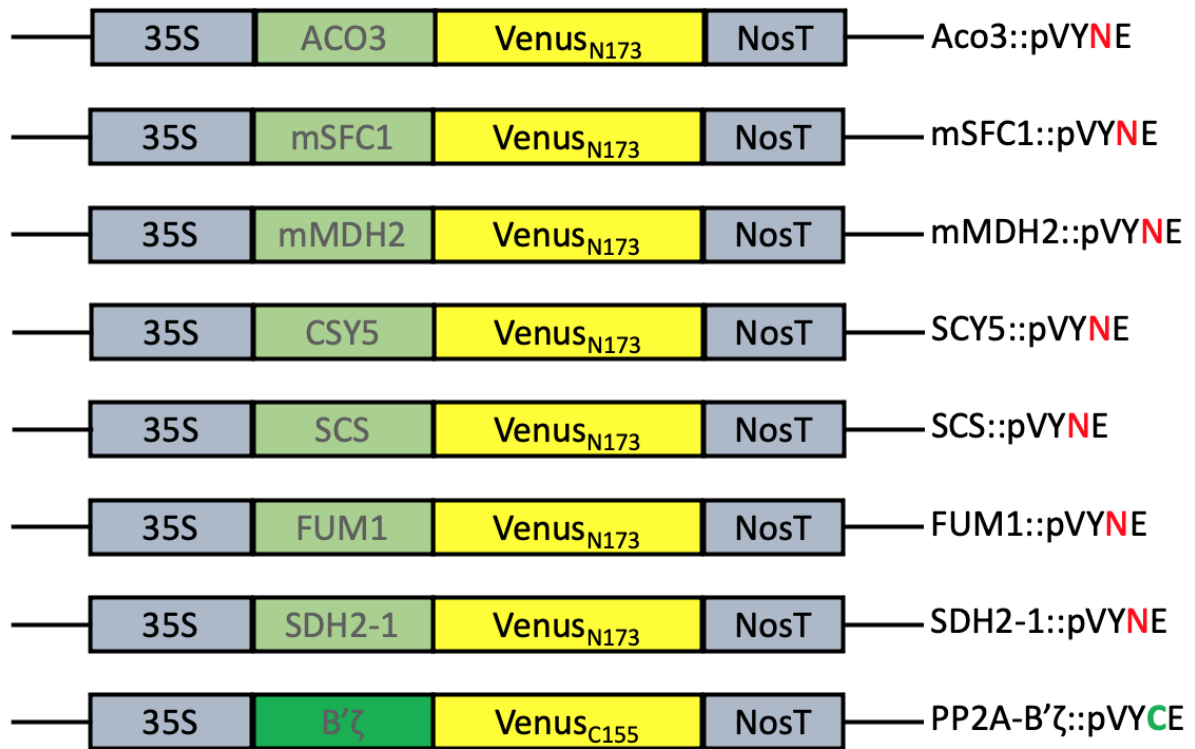

**Figure S1.** Schematic representation of BiFC constructs. The seven interactor candidates were fused at their respective C-terminus to the N-terminal part of Venus (pVYNE vector), while the regulatory subunit PP2A-B'ζ was fused at its C-terminus to the C-terminal part of Venus (pVYCE vector). All fusion proteins were expressed from the CaMV 35S promoter. N173: amino acids 1-173 of Venus. C155: Venus amino acids 155-238.

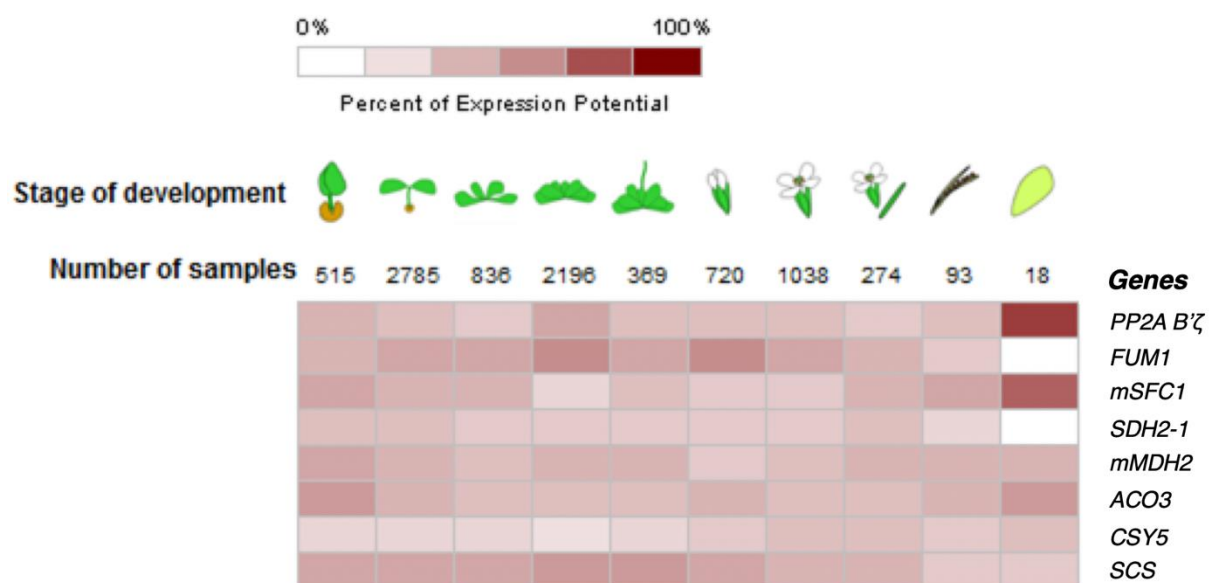

**Figure S2.** GeneVestigator expression study of genes coding for proteins involved in energy metabolism. All genes are expressed throughout development, and *PP2A-B'ζ*, *mSFC1* and *ACO3* are upregulated in senescent leaves.

**Table S1. Oligonucleotide sequences for genotyping and cloning.**

| Name         | Template  | Sequence                         | Usage                      |
|--------------|-----------|----------------------------------|----------------------------|
| Z1_150586_LP | AT3G21650 | TTTTCAC TTCAGAGTCAGCCG           | Genotyping                 |
| Z1_150586_RP | AT3G21650 | ATGGTGCATCGACCTTACATC            |                            |
| Z2_107944_LP | AT3G21650 | CACTCGTCGAAAAGAACTTGG            |                            |
| Z2_107944_RP | AT3G21650 | CCGAATCTCTTTATCGGGAAG            |                            |
| Z_F          | AT3G21650 | ATAGTCGACATGATCAAACAGATATTTGG    | Cloning<br>(BiFC<br>Venus) |
| Z_R          | AT3G21650 | ATGGTACCCGACCCTGTGGACTCAGA       |                            |
| FUM1_F       | AT2G47510 | ATACTAGTATGTTCGATTTACGTCGCGTCG   |                            |
| FUM1_R       | AT2G47510 | ATATCTCGAGATCGGAGGGACCAATCAT     |                            |
| mSFC1_F      | AT5G01340 | ATACTAGTATGGCGACGAGAACGGAA       |                            |
| mSFC1_R      | AT5G01340 | ATATCTCGAGTAAAGGAGCATTCGGAAG     |                            |
| SDH2-1_F     | AT3G27380 | ATACTAGTATGGCGTCTGGTTTGATCG      |                            |
| SDH2-1_R     | AT3G27380 | ATATCTCGAGACGCTGAAGTTGCTTGAT     |                            |
| mMDH2_F      | AT3G15020 | ATACTAGTATGTTCCGATCAATGATTGTTC   |                            |
| mMDH2_R      | AT3G15020 | ATATCTCGAGTTGGTTGGCAAATTTGAT     |                            |
| ACO3_F       | AT2G05710 | ATACTAGTATGTATTTAACCGCTTCATCTTCC |                            |
| ACO3_R       | AT2G05710 | ATATCTCGAGTTGCTTGCTCAAGTTTCT     |                            |
| CSY5_F       | AT3G60100 | ATACTAGTATGGTGTTTTTTCGCAGCGTAT   |                            |
| CSY5_R       | AT3G60100 | ATATCTCGAGGCGGTTCAAGCGCGTGAAGTT  |                            |
| SCS_F        | AT5G08300 | ATACTAGTATGTCTAGACAAGTGGCAAGGC   |                            |
| SCS_R        | AT5G08300 | ATATCTCGAGCTGCTTCAAAAGACCTCT     |                            |

**Table S2. Phosphopeptides retrieved from PhosPhAt4 and the literature.** Sites are experimentally verified, except if denoted as ‘Predicted’ on column 5.

| AGI       | Annotation | Phosphopeptide                                                                                          | Hits |
|-----------|------------|---------------------------------------------------------------------------------------------------------|------|
| AT3G14940 | PPC3       | <sup>9</sup> MASIDAQLR <sup>17</sup> (*)                                                                | 34   |
| AT4G37870 | PCK1       | <sup>62</sup> SAPTTPINQNAAAAFAAVSEEER <sup>84</sup> (*)                                                 | 1    |
|           |            | <sup>62</sup> SAPTTPINQNAAAAFAAVSEEER <sup>84</sup>                                                     | 5    |
|           |            | <sup>62</sup> SAPTTPINQNAAAAFAAVSEEER <sup>84</sup>                                                     | 1    |
|           |            | <sup>60</sup> KRSAPTTPINQNAAAAFAAVSEEER <sup>84</sup>                                                   | 1    |
|           |            | <sup>60</sup> KRSAPTTPINQNAAAAFAAVSEEER <sup>84</sup>                                                   | 2    |
|           |            | <sup>60</sup> KRSAPTTPINQNAAAAFAAVSEEER <sup>84</sup>                                                   | 7    |
|           |            | <sup>60</sup> KRSAPTTPINQNAAAAFAAVSEEER <sup>84</sup>                                                   | 1    |
| AT1G77360 | PPR6       | MKNVYRVLK                                                                                               | 2    |
| AT2G05710 | ACO3       | <sup>801</sup> DFNSYGSR <sup>808</sup>                                                                  | 1    |
|           |            | <sup>801</sup> DFNSYGSRR <sup>809</sup>                                                                 | 1    |
|           |            | <sup>89</sup> TFSSMASEHPFK <sup>100</sup>                                                               | 2    |
|           |            | <sup>89</sup> TFSSMASEHPFK <sup>100</sup>                                                               | 46   |
| AT5G01340 | mSFC1      | <sup>94</sup> QTAFKDSEIGUVSNRGRFLSGFG <sup>116</sup><br><sup>235</sup> KTRLMAQSRDSEGGIRY <sup>251</sup> |      |
| AT2G47510 | FUM1       | <sup>194</sup> TLHSTLESKSFEFK <sup>207</sup>                                                            | 1    |
| AT3G27380 | SDH2-1     | <sup>40</sup> SSGGGRGSNLKTFQIYR <sup>56</sup>                                                           |      |
|           |            | <sup>156</sup> NQYKSIEPWLKRKTTPASVPA <sup>175</sup>                                                     |      |
|           |            | <sup>220</sup> LLHANRWISDSRDEYTKERLE <sup>240</sup>                                                     |      |
| AT3G15020 | mMDH2      | <sup>174</sup> VTTLDVVRARTFYAGKSD <sup>191</sup>                                                        |      |
| AT3G60100 | CSY5       | <sup>1</sup> MVFFRSVSAISRLRSRAVQQSSLNSVRWLHSSE <sup>34</sup>                                            |      |
| AT5G08300 | SCS        | <sup>43</sup> ASDPHPPAAVFVDK <sup>56</sup>                                                              | 1    |
|           |            | <sup>185</sup> IGIMPGYIHKPGK <sup>197</sup>                                                             | 1    |
|           |            | <sup>296</sup> MGHAGAIVSGGK <sup>407</sup>                                                              | 4    |
|           |            | <sup>308</sup> GTAQDKIK <sup>315</sup>                                                                  | 1    |
|           |            | <sup>331</sup> IGSAMYELFQER <sup>342</sup>                                                              | 5    |

(\*) Identical to phosphopeptide detected in our phosphoproteomics analysis (Table S3).

**Table S3. PP2A-B'Z interactors identified by phosphoproteomics.**

| <b>AGI</b> | <b>Annotation</b> | <b>Detected phosphopeptide</b>                                                               | <b>Probability</b> |
|------------|-------------------|----------------------------------------------------------------------------------------------|--------------------|
| AT3G14940  | PPC3              | <sup>9</sup> MASID <sup>S</sup> AQLR <sup>17</sup>                                           | 1                  |
| AT4G37870  | PCK1              | <sup>62</sup> SAP <sup>T</sup> TPINQNAAAAFAAVSEEER <sup>84</sup>                             | 0.967, 0.776       |
| AT1G77360  | PPR6              | <sup>461</sup> <sup>T</sup> <sup>T</sup> QKACVLL EEMIGIRP <sup>S</sup> GVTFGR <sup>486</sup> | 1, 1, 0.786        |
